## **Rapid quantitative imaging of high intensity ultrasonic pressure fields**

Huiwen Luo,<sup>1,2</sup> Jiro Kusunose,<sup>1,3</sup> Gianmarco Pinton,<sup>4</sup> Charles F Caskey,<sup>1,2,3</sup> and  
William A Grissom<sup>1,2,3, a</sup>

<sup>1</sup>*Vanderbilt University Institute of Imaging Science, Nashville, TN,  
USA*

<sup>2</sup>*Department of Biomedical Engineering, Vanderbilt University, Nashville, TN,  
USA*

<sup>3</sup>*Department of Radiology and Radiological Sciences, Vanderbilt University,  
Nashville, TN, USA*

<sup>4</sup>*Department of Biomedical Engineering, University of North Carolina, Chapel Hill,  
NC, USA*

(Dated: 3 February 2020)

1        Abstract High-intensity focused ultrasound (FUS) is a noninvasive technique for ther-  
2        mal or mechanical treatment of tissues that can lie deep within the body, with a  
3        growing body of FDA-approved indications. There is a pressing need for methods to  
4        rapidly and quantitatively map FUS beams for quality assurance in the clinic, and to  
5        accelerate research and development of new FUS systems and techniques. However,  
6        conventional ultrasound pressure beam mapping instruments including hydrophones  
7        and optical techniques are slow, not portable, and expensive, and most cannot map  
8        beams at actual therapeutic pressure levels. Here, we report a rapid projection imag-  
9        ing method to quantitatively map FUS pressure beams based on continuous-wave  
10       background-oriented schlieren (CW-BOS) imaging. The method requires only a wa-  
11       ter tank, a background pattern and a camera, and uses a multi-layer deep neural  
12       network to reconstruct beam maps. Results at two FUS frequencies show that CW-  
13       BOS imaging can produce high-resolution quantitative projected FUS pressure maps  
14       in under ten seconds, that the technique is linear and robust to beam rotations and  
15       translations, and that it can accurately map aberrated beams.

Keywords: Schlieren, Beam mapping, Therapeutic ultrasound, Deep learning

---

<sup>a</sup>[will.grissom@vanderbilt.edu](mailto:will.grissom@vanderbilt.edu)

## 16 I. INTRODUCTION

17 Focused ultrasound (FUS) with pressures up to several megapascals (MPa) is a noninva-  
18 sive therapeutic modality that has a broad range of established and emerging applications,  
19 including tumor and fibroid destruction, drug delivery, brain surgery<sup>1</sup>, blood-brain barrier  
20 opening and neuromodulation. Ablative FUS was recently FDA-approved for treating essen-  
21 tial tremor<sup>2</sup>, and clinical trials are ongoing to establish its safety and efficacy in delivering  
22 Alzheimers disease drugs via blood brain barrier opening<sup>3</sup>. The method can be highly se-  
23 lective and can produce very sharp margins as narrow as six cells between an ablated lesion  
24 and viable tissue<sup>4</sup>. To maximize FUS's therapeutic benefit, it is required to know how much  
25 acoustic energy is delivered and where it is delivered, with high spatial accuracy and pre-  
26 cision. Furthermore, for therapeutic efficacy and safety it is necessary to assess whether  
27 the FUS system output changes between treatments, and to check for system failures which  
28 could dangerously alter energy delivery. Experts have recommended that rigorous quanti-  
29 tative beam mapping be performed on clinical systems two to three times monthly<sup>5</sup>. For  
30 these reasons, the ability to quantitatively map the acoustic beam in two or three spatial  
31 dimensions in the clinic is essential, and it is important for the safety and reproducibility  
32 of FUS treatments that instruments for rapid field characterization become available. FUS  
33 beam mapping is also essential for research and the development of new FUS technologies  
34 and techniques, such as new therapeutic transducers<sup>6</sup>, methods to propagate FUS beams  
35 through the skull and other bones<sup>7-9</sup>, acoustic lenses<sup>10-12</sup>, and FUS-transparent MRI RF  
36 coils<sup>13</sup>. Beam mapping is also essential for focused imaging transducers, whose mechanical

37 index must be characterized to ensure they meet safety guidelines set by the US Food and  
 38 Drug Administration.

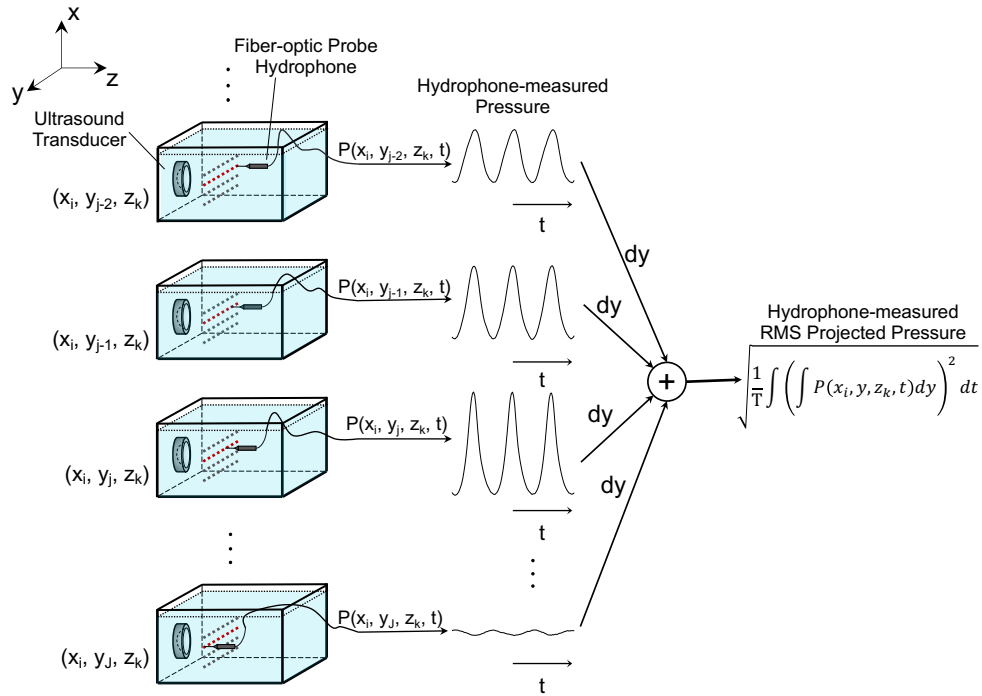

FIG. 1. 3D ultrasonic pressure field measurements using a hydrophone. The probe sensor of hydrophone samples only one spatial location at a time, so it must be translated by a motion stage to obtain a spatially-resolved map. To obtain the same root-mean-square (RMS) projected pressure map as the proposed CW-BOS method, hydrophone measurements are integrated along the line-of-sight dimension to obtain projected pressure waveforms, and then the RMS amplitude of the projected waveform is calculated.

39 The most widely-used FUS beam mapping instruments are hydrophones. They are ill-  
 40 suited to rapidly mapping beams produced by FUS transducers, because they provide fine  
 41 temporal resolution but (as illustrated in Fig. 1) they only sample one spatial location at

42 a time, and a 3D motion stage must be used to move them through a tank to produce a  
43 spatially-resolved beam map. This results in long measurement times that even with variable  
44 density sampling schemes can take up to several hours for 3D volumes. Furthermore, fine  
45 temporal resolution is not required for the majority FUS applications where the transducer  
46 is operated in a continuous-wave mode. The long measurement times limit hydrophones'  
47 usefulness in measuring beams at multiple power levels or across ranges of experimental  
48 variables. Common polyvinylidene fluoride (PVDF) hydrophones are not prohibitively ex-  
49 pensive but can only measure sub-therapeutic pressure levels since they are easily damaged  
50 by cavitation. To overcome their speed and power limitations, hydrophone measurements  
51 have been combined with computational modeling (holography)<sup>14,15</sup>, but these methods still  
52 require a large number of hydrophone measurements over a two-dimensional surface. More  
53 expensive (> \$10k USD) membrane<sup>16</sup> and fiber optic hydrophones<sup>17</sup> can withstand higher  
54 pressures, but they are less sensitive than PVDF hydrophones, and bandwidth limitations  
55 at high pressures can be a problem. Any instrument that sits in the focus will experience  
56 damage due to cavitation, and will require periodic repair and recalibration, and hydrophone  
57 systems lack the portability needed for clinical quality assurance measurements.

58       Ultrasound pressure beams can also be mapped based on the deflection of light due to  
59 the acousto-optic effect. Optical ultrasound beam mapping methods such as photographic  
60 and laser schlieren methods have been used for more than fifty years to visualize ultrasound  
61 pressure fields in two dimensions<sup>18-26</sup>, and laser-based tomographic schlieren methods have  
62 been developed for temporally-resolved 3D ultrasound pressure field mapping<sup>22,27-32</sup>. The  
63 laser-based systems are based on the same physical principle as the technique proposed

64 here, and are capable of impressive spatiotemporal resolution and sensitivity. However, they  
65 are limited to small FOVs and are prohibitively expensive ( $> \$10k$  USD). Furthermore,  
66 to perform 3D mapping they typically require that the transducer itself be rotated, which  
67 makes them incompatible with in situ clinical transducers and limits their research utility.

68 Unlike conventional schlieren systems that require elaborate optical setups involving  
69 pulsed light sources, collimating lenses, and filters, background-oriented schlieren (BOS)<sup>33</sup>  
70 imaging uses only a camera to image a background pattern through a nonuniform refractive  
71 index field. The background pattern is blurred by the nonuniform refractive index field, and  
72 cross-correlation of images acquired with and without the refractive index field in place pro-  
73 duces index of refraction maps. In essence, in BOS the conventional sophisticated schlieren  
74 optical setup is traded for more sophisticated computation, which is much less expensive  
75 and easily replicated. The method has been used tomographically outside of acoustics to  
76 map static refractive index fields in 3D<sup>33–39</sup>, and it has been used to visualize FUS beams  
77 qualitatively in 2D<sup>40</sup>. However, the image formation process in BOS imaging of FUS beams  
78 is different from conventional BOS, because the refractive index is proportional to pressure<sup>41</sup>  
79 which changes dynamically during a typical camera exposure time, so the background image  
80 is blurred rather than coherently displaced, and cross-correlation cannot be directly applied  
81 to extract refractive index or pressure maps. To freeze time to a fixed phase in the ultra-  
82 sound cycle, tomographic BOS FUS beam mapping has been performed with a strobed light  
83 source<sup>42,43</sup>, but these methods have not yet been validated beyond qualitative comparisons  
84 to hydrophone measurements, and a strobed light source again complicates the setup and  
85 limits signal-to-noise.

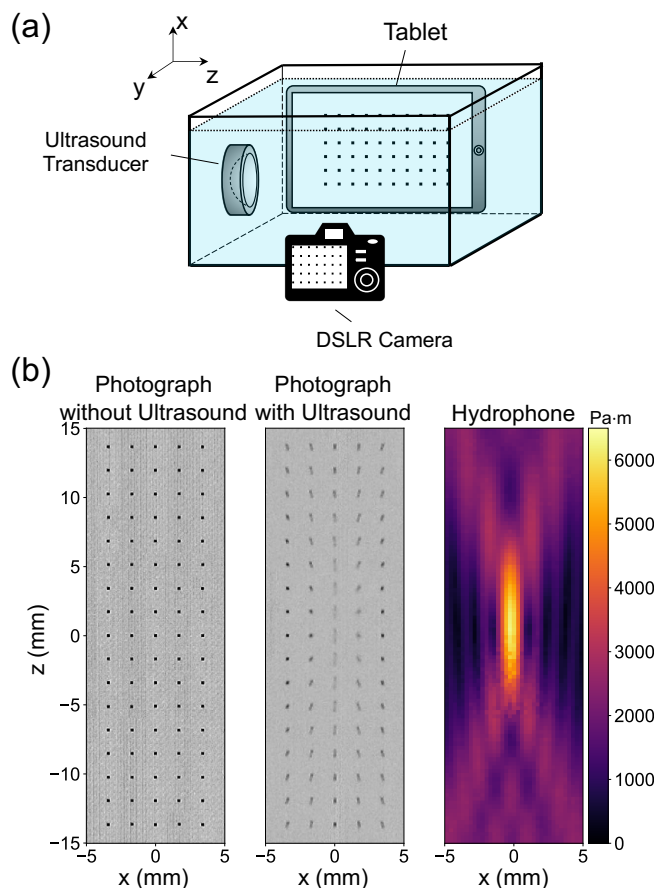

FIG. 2. The proposed continuous-wave background-oriented schlieren (CW-BOS) beam mapping method displays a bed-of-nails pattern on one side of a water tank, and photographs it from the other side of the tank. When FUS is switched on, the nails blur in a distinctive pattern that can be related to the projected pressure field. a) A 2D CW-BOS system comprises a glass tank filled with water that is acoustically coupled to the ultrasound transducer, a tablet displaying a background pattern, and a camera to photograph the pattern when the FUS beam is turned on. b) Acquired photographs without and with FUS, and a hydrophone-measured RMS projected pressure map of the same FUS beam. In the photographs, the blurred nails are narrower and elongated along the beam propagation direction (top to bottom) in the focus, while the nails are blurred diagonally on either side of the focus. The FUS beam is propagating from top to bottom in these images.

86 Here we describe a rapid projection imaging method to quantitatively map FUS pressure  
87 fields based on continuous-wave BOS (CW-BOS) imaging. It requires only a water tank,  
88 a background pattern displayed on one side of the tank, and a camera to photograph the  
89 pattern through the other side of the tank (Fig. 2a). The proposed method leverages the  
90 recent availability of tablet PCs with high-resolution displays and consumer-grade digital  
91 single-lens reflex cameras with high pixel density that can resolve the sub-millimeter blurring  
92 of the BOS background pattern at a distance, as well as deep learning techniques that  
93 solve the difficult inverse problem of relating blurred photographs to projected pressure  
94 amplitudes. It can be implemented in a small and portable package to rapidly map FUS and  
95 focused imaging transducer beams in 2D, and there are no parts to experience wear from  
96 the FUS beam. Illustrated in Fig. 2b, the background images are bed-of-nails patterns,  
97 where each dot is blurred by the ultrasound beam in a distinctive pattern that can be  
98 interpreted as a histogram of local image displacement over time and is related to the  
99 projected root-mean-square (RMS) pressure field. Reconstruction is carried out using a  
100 deep neural network that relates each histogram in the photograph to an RMS projected  
101 pressure amplitude, and is trained from simulated photographs. Fig. 1 illustrates how the  
102 RMS projected pressure amplitude would be obtained using hydrophone measurements with  
103 a motion stage, which requires several hours of scan time, while the proposed method can  
104 produce the same measurement in seconds. The method was implemented and compared to  
105 fiber-optic hydrophone measurements, to evaluate its feasibility, accuracy and robustness.



## 106 II. METHODS

### 107 A. CW-BOS FUS Beam Mapping Hardware Setup.

108 Fig. 3 shows the hardware setup for CW-BOS FUS beam mapping, which was built  
109 around an ultra-clear rimless water tank (Fragtastic Reef, Mankato, MN, USA) made of  
110 5 mm-thick aquarium-grade glass. The size of glass tank was  $31 \times 19 \times 19$  cm<sup>3</sup> (width  $\times$   
111 depth  $\times$  height), and it was filled with degassed deionized water. To suppress reflections, an  
112 acoustic absorber (Aptflex F48, Precision Acoustic Ltd, UK) was placed against the tank  
113 wall opposite the FUS transducer. Two FUS transducers were used in this study: a 6.32  
114 cm-diameter 1.16 MHz transducer with focal length 6.3 cm and f-number 2 (H101, Sonic  
115 Concepts, Bothell, WA, USA), and a 1.91 cm-diameter 2.25 MHz transducer with focal  
116 length 5.1 cm and f-number 2 (Valpey Fisher IL0206HP, Hopkinton, MA, USA).

118 A 10.5" iPad Pro (Apple Inc, Cupertino, CA, USA) was placed against one of the long  
119 sides of the tank, which displayed bed-of-nails background images using a Python script  
120 running in the Pythonista app (OMZ Software, Berlin, Germany). The experiment computer  
121 told the iPad which background image to display via TCP/IP commands sent over WiFi.  
122 An EOS 80D 24.2 megapixel digital single-lens reflex (DSLR) camera with an EF-S 17-  
123 55mm f/2.8 IS USM lens (Canon Inc, Tokyo, Japan) was placed so that its body was 12  
124 cm from the outer wall of the tank opposite the iPad, and was connected to the experiment  
125 computer via USB. The camera's settings were controlled and photos were downloaded  
126 from it using the EOS Utility software (Canon Inc, Tokyo, Japan). An Arduino Leonardo  
127 R3 microcontroller board (Arduino, Italy) was used to open the camera shutter a fixed

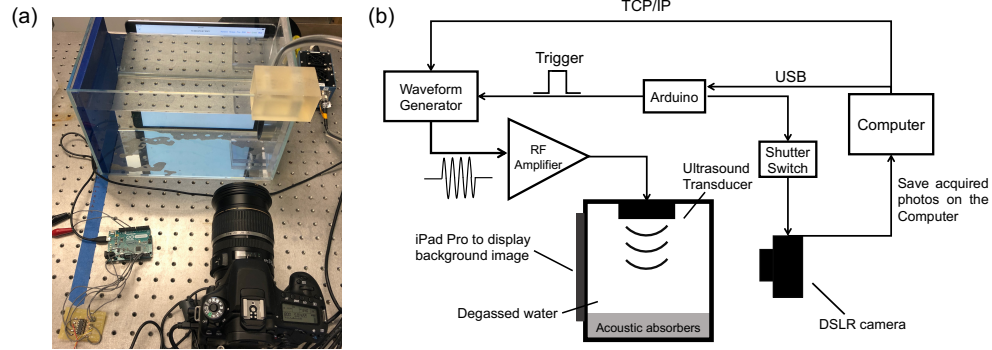

FIG. 3. a) Photograph of the CW-BOS measurement setup used in this study. The camera is in the lower right and was centered on the nominal FUS beam focus. The iPad was placed against the opposite side of the water tank from the camera, the FUS transducer was mounted on the right side of the tank, and a blue acoustic absorber was mounted on the left side opposite the transducer to suppress reflections. b) Electrical diagram of the setup, including a top-down depiction of the tank. An Arduino was used to open the camera shutter a fixed time period after triggering the waveform generator, so that photos were taken when the FUS beam was at steady-state. The experiment was coordinated by a MATLAB script which set the waveform generator parameters and initiated an acquisition via the Arduino.

128 delay period after triggering the waveform generator, so that photos were taken when the  
129 FUS beam was at steady-state. The Arduino controlled the shutter via an analog switch  
130 (CD74HC4066E, Texas Instruments, Dallas, TX, USA) which electrically closed two switches  
131 (focus and shutter) of a modified wired manual shutter release that was connected to the  
132 N3 connector of the camera, and it sent a TTL trigger to the external trigger port of the  
133 FUS waveform generator (Keysight 33500B series, Santa Rosa, CA, USA) to initiate the  
134 FUS. The waveform generator's parameters were set using TCP/IP commands sent from

135 the computer via an ethernet connection, and its output was connected to an E&I A-150  
136 amplifier (E&I Ltd, Rochester, NY, USA) to drive the transducer.

## 137 **B. CW-BOS Acquisition Details**

138 Acquisitions were initiated by the experiment computer. When instructed by the com-  
139 puter, the Arduino sent a TTL pulse to the waveform generator to generate a 100,000-cycle,  
140 86 ms pulse at 1.16 MHz, and a 150,000-cycle, 67 ms pulse at 2.25 MHz, then waited 50 ms  
141 and opened the camera shutter. The camera settings were: image size 4000×6000 pixels,  
142 ISO 640, shutter speed 1/800 s, f-number f/5. The photographs were saved on the computer  
143 in the RAW image format. The shutter speed corresponded to 1,450 FUS cycles for the  
144 1.16 MHz transducer, and 2,813 FUS cycles for the 2.25 MHz transducer. During the ex-  
145 periments, the whole measurement setup was covered by a black cloth to suppress ambient  
146 light, so the iPad provided the only illumination.

147 The background images displayed by the iPad were bed-of-nails patterns comprising black  
148 dots/nails on a regular grid with a white background. The size of each dot was 2 pixels × 2  
149 pixels. The distance between consecutive dots in each direction was 8 dots (16 pixels), which  
150 corresponded to a physical distance of 1.7 mm, and was set based on the maximum expected  
151 displacement in the experiments. To obtain a high-resolution beam map, 16 (4×4) photos  
152 were acquired across a series of equal-interval grid translations in the  $x$  and  $z$  dimension, as  
153 illustrated in Fig. 4. The images were segmented into small rectangular patches around each  
154 dot using MATLAB's `bwmorph` function (Mathworks, Natick, MA, USA), then the RMS  
155 projected pressure was calculated by the neural network for each dot as described below,

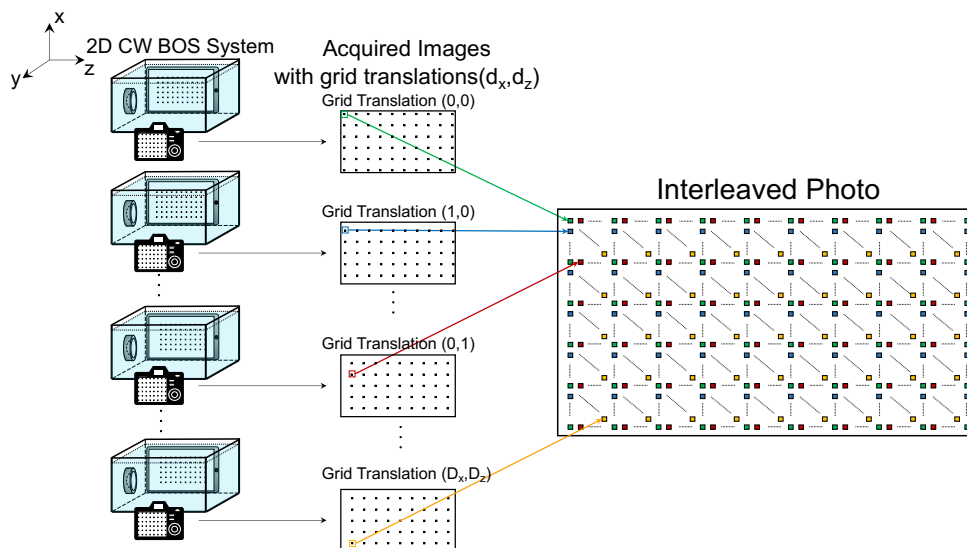

FIG. 4. To measure a high-resolution beam maps, multiple CW-BOS images were collected over a range of grid translations in the  $x$  and  $z$  directions. The reconstructed projected RMS pressure values were then tiled into the final beam map.

156 and those values were tiled into the final reconstructed beam map. With the camera placed  
157 a total distance of 31 cm from the iPad, each rectangular patch comprised between  $42 \times 42$   
158 and  $46 \times 46$  pixels, and was upsampled to  $54 \times 54$  pixels for reconstruction. To avoid optical  
159 color dispersion, only the green channel from the photos was used for reconstruction, which  
160 has the largest weight in Rec.ITU-R BT.601-7<sup>44</sup>. The total scan time for 5 averages was  
161 3-5 minutes and was dominated by delays including photo transfers from the camera to the  
162 experiment PC. Without these delays, the total scan times were approximately 8 seconds  
163 ( $16 \text{ photos} \times 100 \text{ ms of FUS on-time} \times 5 \text{ averages}$ ).

### 164 C. Optical Hydrophone Measurements

165 For validation, the FUS beams were also measured using fiber-optic hydrophones<sup>45</sup> (136-  
166 10T and 132-03, Precision Acoustic Ltd, UK). The hydrophone measurements were per-  
167 formed in the same water tank as CW-BOS, using a Picoscope (Model 5242B, Pico Technol-  
168 ogy, UK) to record data to the computer, and a 3D motion stage (Image Guided Therapy,  
169 Bordeaux, France). The motion stage and Picoscope were both controlled by the experiment  
170 computer via USB. As illustrated in Fig. 1, to calculate reference RMS projected pressure  
171 maps from the hydrophone data, the synchronized hydrophone measurements were inte-  
172 grated along the line-of-sight ( $y$ ) dimension to calculate the projected pressure waveforms  
173 and RMS projected pressure, using five FUS cycles from middle of the hydrophone-measured  
174 pulses. The 1.16 MHz maps were measured over a  $10 \times 10 \times 30$  ( $x \times y \times z$ ) mm<sup>3</sup> volume at  
175 1.16 MHz, and a  $10 \times 10 \times 47.5$  mm<sup>3</sup> volume at 2.25 MHz, with step sizes of 0.25 mm in  $x$   
176 and  $y$ , and 0.25 mm in  $z$  at 1.16 MHz and 0.5 mm at 2.25 MHz. The total scan time was  
177 approximately 6.7 hours for the 1.16 MHz transducer (200,000 spatial locations) and 5.5  
178 hours for the 2.25 MHz transducer (160,000 spatial locations).

### 179 D. Mathematical Model for CW-BOS Imaging of FUS Pressure Fields.

Fig. 2a shows that when a background image displayed by the tablet is photographed  
through the water tank by the camera, the image is distorted due to the refraction of light  
rays as they travel through the water from the tablet to the camera lens. The refraction  
angle in each of the photographed dimensions ( $x$  and  $z$ ) is determined by the refractive index

of the water:

$$\begin{aligned}\epsilon_x &= \frac{1}{n_0} \frac{\partial}{\partial x} \int n(x, y, z, t) dy \\ \epsilon_z &= \frac{1}{n_0} \frac{\partial}{\partial z} \int n(x, y, z, t) dy\end{aligned}\quad (1)$$

180 where  $n_0$  is the ambient refractive index of water,  $n$  is the 3D refractive index field,  $y$  is the  
181 projected (line-of-sight) dimension. The 3D refractive index field ( $n$ ) is proportional to the  
182 acoustic pressure  $p$ <sup>41</sup>:

$$n(x, y, z, t) = n_0 + \frac{\partial n}{\partial p} p(x, y, z, t), \quad (2)$$

where  $\frac{\partial n}{\partial p} = 1.4636 \times 10^{-11} \text{ Pa}^{-1}$  is the adiabatic piezo-optic coefficient<sup>46,47</sup>. Assuming the light ray is deflected as it passes through the FUS beam's refractive index field and then continues across a distance  $D$  in the  $y$  dimension before being recorded by the camera, the image displacement at a location  $(x, z)$  in the photograph of the tablet's image is obtained by substituting Equation 2 into Equation 1 and scaling by  $D$ :

$$\begin{aligned}d_x &= K \frac{\partial}{\partial x} \int p(x, y, z, t) dy \\ d_z &= K \frac{\partial}{\partial z} \int p(x, y, z, t) dy,\end{aligned}\quad (3)$$

183 where  $K = \frac{D}{n_0} \frac{\partial n}{\partial p}$ . In this equation, the integral of the 3D pressure field along the projected  
184 dimension ( $y$ ) is the projected pressure field  $P_{proj}(x, z, t)$ . This forward model was used to  
185 calculate the CW-BOS histograms to train the neural network reconstructor as described  
186 below.

## 187 **E. Numerical FUS Beam Simulations and Training Data Generation.**

188 To generate the FUS-blurred background images used to train the reconstructor, spatially-  
189 and temporally-resolved steady-state FUS pressure fields with nonlinearity were simulated  
190 using a modified angular spectrum method<sup>48</sup> with frequency domain attenuation and dis-  
191 persion, absorbing boundary layers, and an adaptive propagation step size. An operator  
192 splitting term was used to separate the terms in the retarded-time formulation of the  
193 nonlinear angular spectrum equation<sup>49</sup>. The attenuation and dispersion term was solved  
194 directly in the frequency domain using a filtering approach. The nonlinear term was solved  
195 in the time domain using a Rusanov scheme to accurately capture the shock front in a  
196 flux-conservative fashion<sup>50</sup>. The simulations used a speed of sound of  $c_0 = 1500$  m/s,  $\lambda/8$   
197 grid spacing in the dimensions transverse to beam propagation (0.16 mm at 1.16 MHz and  
198 0.08 mm at 2.25 MHz),  $\lambda/4$  grid spacing in the axial/propagation dimension (0.32 mm at  
199 1.16 MHz and 0.16 mm at 2.25 MHz), a nonlinearity coefficient of  $\beta = 3.5$ , an equilibrium  
200 density  $\rho_0 = 1000$  kg/m<sup>3</sup>, and a dwell time of  $1/(40f_0)$  (21.5 ns at 1.16 MHz and 11.1 ns  
201 at 2.25MHz). The beams were simulated over a  $9.5 \times 9.5 \times 9.5$  cm<sup>3</sup> volume for the larger  
202 1.16 MHz transducer and a  $3.8 \times 3.8 \times 3.8$  cm<sup>3</sup> volume for the smaller 2.25 MHz transducer.  
203 The simulated transducers generated 12-cycle pulses, and the middle cycle was saved at  
204 each spatial location, representing steady-state. A total of 34 simulations were run for the  
205 1.16 MHz transducer, for peak negative pressure amplitudes between 1 - 11.5 MPa, and  
206 f-numbers of 1 and 2. A total of 38 simulations were run for the 2.25 MHz transducer, for  
207 1.2-10 MPa, and f-numbers of 1 and 2.

208 The training data for the reconstructor comprised histograms paired with their projected  
209 RMS pressure values. First, projected pressure waveforms were calculated by integrating  
210 the beams along the  $y$  dimension, and projected RMS pressure values were calculated from  
211 those waveforms. To calculate a histogram for each simulated  $(x, z)$  location, projected  
212 pressure waveforms were first calculated, then image displacements were calculated using  
213 Equation 3, which required finite differencing the  $y$ -projected pressure fields in the  $x$  and  $z$   
214 dimensions and scaling the result by the distance  $D$  between the focus and the tablet screen  
215 ( $D = 8.5$  cm for our hardware setup). Then, for each time instant, a distorted image was  
216 computed by shifting the spatial location's nail by the calculated image displacements in  
217 each direction, and the distorted images were summed over one ultrasound period to obtain  
218 a final simulated BOS histogram image. The simulated histograms were convolved with  
219 a point spread function measured from an undistorted (no-FUS) photograph taken with  
220 our system. The histograms were individually normalized for zero mean and unit standard  
221 deviation, and the RMS projected pressures were collectively normalized. The histogram  
222 dimensions were  $54 \times 54$ , which corresponded to a spatial area of size  $1.7 \times 1.7$  mm<sup>2</sup> on the  
223 screen of the tablet, with a pixel width of 0.024 mm. The 1.16 MHz training data comprised  
224 a total of  $N = 744885$  examples, and the 2.25 MHz training data comprised a total of  
225  $N = 554905$  examples.

226 Prior to inputting them to the reconstructor network, the training histograms were com-  
227 pressed to a dimensionality smaller than their number of pixels by projecting them to a  
228 subspace derived by singular value decomposition (SVD) truncation<sup>51,52</sup>. For each FUS fre-  
229 quency, a dictionary was formed from all the training data by reshaping the histograms to



length- $M$  row vectors  $\mathbf{d} \in R^{1 \times M}$ , where  $M = 54^2 = 2916$ , and stacking them into a dictio-  
nary matrix  $\mathbf{D} \in R^{N \times M}$ , where  $N$  is the number of training examples. The matrix  $\mathbf{D}$  was  
decomposed by SVD into the product of three matrices,  $\mathbf{D} = \mathbf{U}\mathbf{S}\mathbf{V}^T$ , where  $\mathbf{U} \in R^{N \times M}$  is  
an orthonormal matrix containing the left singular vectors,  $\mathbf{S} \in R^{M \times M}$  is a diagonal matrix  
containing the singular values, and  $\mathbf{V} \in R^{M \times M}$  is an orthonormal matrix of right singular  
vectors. A lower dimensional compressed subspace was obtained by truncating the SVD to  
its first  $K$  singular values (where  $K = 141$  at 1.16 MHz and 118 at 2.25 MHz), and the  
vectors of the resulting truncated right singular vector matrix  $\mathbf{V}_K \in R^{M \times K}$  spanned this  
lower-dimensional subspace. Thereafter, each training and experimental BOS histogram  $\mathbf{d}$   
was projected to the lower-dimensional subspace by multiplying it with the matrix  $\mathbf{V}_K$  to  
obtain its compressed coefficients  $\mathbf{c} = \mathbf{d}\mathbf{V}_K$ . These coefficients were the inputs to the neural  
network to obtain the projected RMS pressure values, as illustrated in Fig. 5a. The ma-  
trices  $\mathbf{V}_K$  were stored and used to compress experimentally measured histograms prior to  
reconstruction of their projected RMS pressures.

## F. Neural Network Architecture and Training.

To reconstruct RMS projected pressure maps from a set of photographs, Fig. 5 shows that  
each histogram is projected into the compressed SVD subspace, and the resulting length- $K$   
vector of coefficients  $\mathbf{c}$  is input to a deep neural network comprising three fully connected  
layers (FC1 to FC3 in Fig. 5). The input and fully connected layers all have  $K$  nodes, and  
each is followed by a hyperbolic tangent activation function. The output layer comprises

250 a linear activation function and has one node, the output of which is the RMS projected  
251 pressure for the input histogram coefficients.

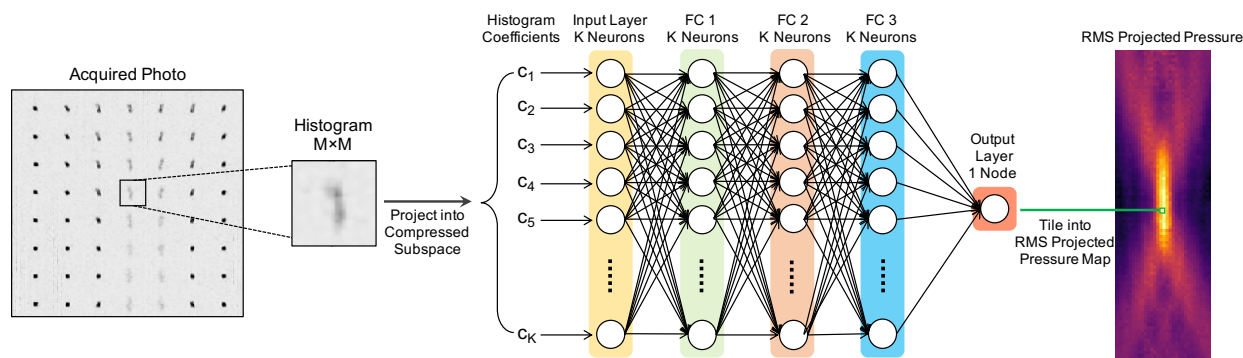

FIG. 5. Schematic representation of neural network-based pressure reconstruction for each photographed histogram. Each histogram in a photo is segmented into an  $M \times M$  sub-image, and then projected to the compressed subspace, and its  $K$  ( $K \ll M$ ) coefficients in that subspace are input to a deep neural network with a fully-connected input layer and three fully-connected hidden layers and hyperbolic tangent activations, which feed a single-node layer that outputs the final estimated RMS projected pressure value, which is tiled into the final beam map.

252 A network was trained for each frequency in Keras<sup>53</sup> on the Tensorflow deep learning  
253 framework<sup>54</sup> using two NVIDIA graphics processing units (NVIDIA, Santa Clara, CA, USA)  
254 for 20 epochs (approximately 1 hours), on Vanderbilt University's parallel computing cluster  
255 (Advanced Computing Center for Research and Education, Vanderbilt University, Nashville,  
256 TN). Each batch was trained for 400 steps. The optimization algorithm RMSProp<sup>55</sup> was  
257 used with mini-batches of size 1024, a learning rate of 0.00005, momentum 0.0 and decay  
258 0.9. Mean squared error was used as the loss function for training. An additional  $L_1$ -norm  
259 penalty ( $\lambda_1 = 0.00002$ ) was used to promote sparsity of the weights in the input layer,

260 and an  $L_2$ -norm penalty ( $\lambda_2 = 0.0002$ ) was used to prevent overfitting in the each layer.  
261 Keras's real-time augmentation was used to rotate the training histograms by  $0^\circ$ -  $30^\circ$  to  
262 achieve robustness to transducer rotations. Given all the acquired photos, the final beam  
263 map reconstructions took approximately 20 seconds of computation on a desktop computer  
264 with a 4.2 GHz Intel Core i7 CPU and 32 GB 2400 MHz DDR4 RAM (iMac, Apple Inc,  
265 Cupertino, CA, USA).

### 266 **III. RESULTS**

#### 267 **A. Two FUS Frequencies**

268 FUS frequencies range from hundreds of kHz to several MHz. To demonstrate the CW-  
269 BOS method at different frequencies, mapping was performed for 1.16 and 2.25 MHz trans-  
270 ducers and compared to optical hydrophone measurements. The FUS pulses were produced  
271 by waveform generators with voltage amplitudes of 200 millivolts peak-to-peak ( $mV_{pp}$ ) (1.16  
272 MHz) and 100  $mV_{pp}$  (2.25 MHz), which corresponded to peak negative pressures (PNP) of  
273 -4.5 MPa (1.16 MHz) and -1.4 MPa (2.25 MHz), as measured by the optical hydrophone.  
274 Fig. 6a shows the hydrophone-measured RMS projected pressure map (left) and recon-  
275 structed CW-BOS RMS projected pressure map (right) at 1.16 MHz, where CW-BOS recon-  
276 struction was performed by segmenting the blurred photograph into a patch containing each  
277 nail and then inputting each segmented patch to the deep neural network to obtain the RMS  
278 projected pressure at that point. The amplitudes and shapes of the hydrophone and CW-  
279 BOS beams matched closely, with a root-mean-squared error (RMSE) of 298 Pa·m, or 4.8%

280 of the hydrophone-measured peak amplitude, and main-lobe full-width at half-maximums  
281 (FWHM's) of 1.5 mm (hydrophone) versus 1.4 mm (CW-BOS) in the  $x$  dimension, and  
282 11.4 mm (hydrophone) versus 11.7 mm (CW-BOS) in the  $z$  dimension. Fig. 6b shows the  
283 hydrophone (left) and CW-BOS (right) RMS projected pressure maps at 2.25 MHz. The  
284 RMSE between the two was 192 Pa·m, or 7.9% of the hydrophone-measured peak amplitude,  
285 the main-lobe FWHM's in  $x$  were 2.1 mm (hydrophone) versus 2.0 mm (CW-BOS), and the  
286 main-lobe full width at 80% of maximum's in  $z$  were 26.4 mm (hydrophone) versus 25.9 mm  
287 (CW-BOS).

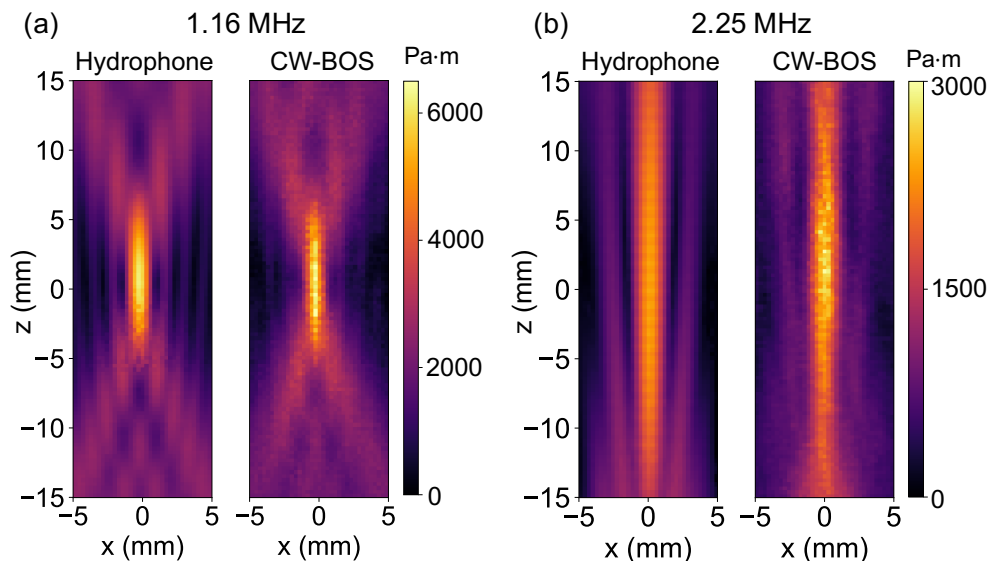

FIG. 6. Comparison of projected pressure maps measured using an optical hydrophone and CW-BOS for two transducers at different frequencies. a) Maps measured for a 1.16 MHz transducer driven at 200 mV<sub>pp</sub>. b) Maps measured for a 2.25 MHz transducer driven at 100 mV<sub>pp</sub>.

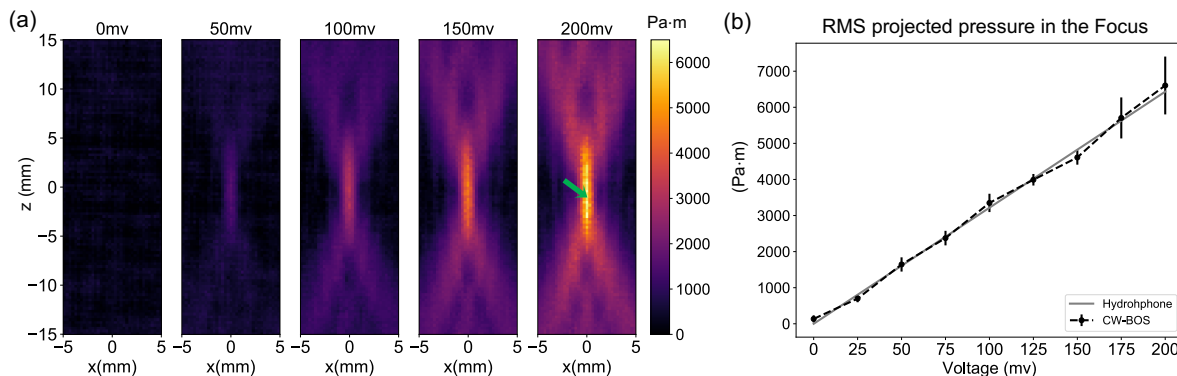

FIG. 7. CW-BOS pressure maps versus driving voltage amplitude. a) Reconstructed RMS projected pressure maps for the 1.16 MHz transducer. b) RMS projected pressure at the focus measured by the hydrophone and CW-BOS, where the CW-BOS values were averaged across five repeated measurements, and the error bars represent standard deviation across the measurements.

## 288 B. Linearity.

289 CW-BOS images were further acquired across transducer driving voltage amplitudes.  
290 Data were acquired with the 1.16 MHz transducer and waveform generator amplitudes be-  
291 tween 0 and 200 mV<sub>pp</sub>, in 25 mV<sub>pp</sub> steps. Fig. 7a shows reconstructed projected pressure  
292 maps across driving voltage amplitudes. Fig. 7b plots the mean across five repetitions of  
293 the projected pressure in the focus (indicated by the arrow in Fig. 7a) at each amplitude,  
294 along with optical hydrophone measurements which were taken at 50, 100, 150, and 200  
295 mV<sub>pp</sub>, which corresponded to PNPs of -1.5 MPa (50 mV<sub>pp</sub>), -2.5 MPa (100 mV<sub>pp</sub>), -3.6  
296 MPa (150 mV<sub>pp</sub>), and -4.5 MPa (200 mV<sub>pp</sub>). The error bars represent the standard devia-  
297 tion of the values over the five repetitions. The fitted slopes of the RMS projected pressure

298 amplitudes were  $32.2 \text{ Pa}\cdot\text{m}/\text{mV}_{\text{pp}}$  (hydrophone) versus  $32.3 \text{ Pa}\cdot\text{m}/\text{mV}_{\text{pp}}$  (CW-BOS). The  
299 Pearson's  $r$ -value between the hydrophone and CW-BOS measurements was 0.998.

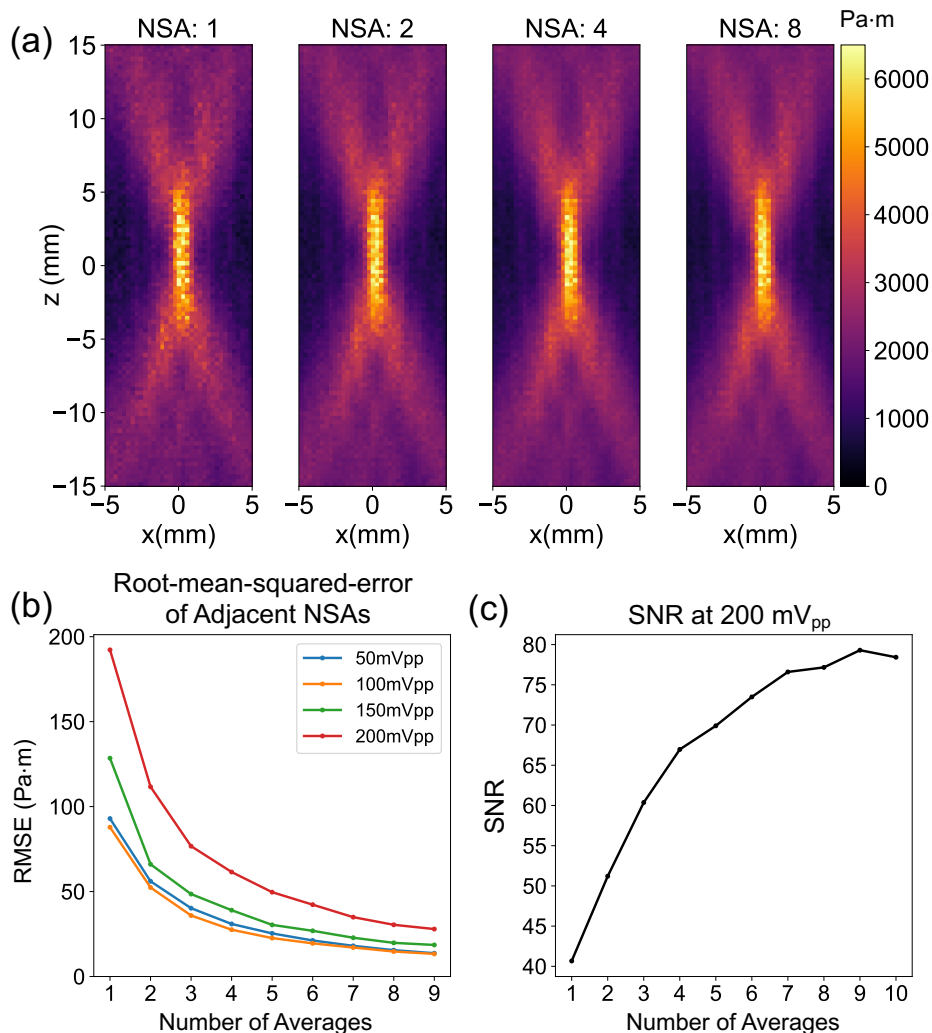

FIG. 8. Signal-to-noise and reconstruction from different numbers of averages. a) Reconstructed RMS projected pressure maps with 1 to 8 averages with a driving voltage of  $200 \text{ mV}_{\text{pp}}$  at 1.16 MHz. b) Mean-squared-error between maps resulting from  $i + 1$  versus  $i$  averages in a  $5.6 \times 20 \text{ mm}^2$  region around the focus. c) SNR around the focus with a driving voltage of  $200 \text{ mV}_{\text{pp}}$  and one to ten averages.

### 300 C. Signal-to-Noise Ratio and Number of Averages.

301 Fig. 8 shows that noise can be reduced by averaging reconstructions from repeated CW-  
302 BOS acquisitions. Fig. 8a shows reconstructed CW-BOS projected pressure maps between  
303 one and eight averages for a driving voltage of 200 mV<sub>pp</sub>, and the apparent noise is reduced  
304 significantly comparing 1 and 8 averages. Ten repetitions were further acquired at driving  
305 voltages of 50, 100, 150, and 200 mV<sub>pp</sub>, and Fig. 8b plots the decremental RMS error in  
306 a  $5.6 \times 20$  mm<sup>2</sup> region centered on the focus between maps reconstructed from one to ten  
307 averages. The differences stopped changing significantly after five averages. Fig. 8c plots the  
308 incremental signal-to-noise ratio (SNR) around the focus of reconstructed 200 mV<sub>pp</sub> maps  
309 from one to ten averages; with one acquisition the SNR was 40, but was improved to 70 by  
310 five averages. Here, SNR was calculated as the ratio of the signal amplitude in the middle  
311 of the focus to the standard deviation in background regions without significant projected  
312 pressures. Overall, for our setup, the maps stop changing significantly after five averages,  
313 so this number was used for all experimental results.

### 314 D. Rotational and Translational Invariance.

315 User error could introduce rotations and displacements between the camera and the FUS  
316 beam, so the method should be robust to a reasonable range of such errors. The top row  
317 of Fig. 9a shows CW-BOS RMS projected pressure maps imaged with a 200 mV<sub>pp</sub> driving  
318 voltage, with no transducer rotation (the reference case), and 15° and 30° rotation about the  
319 y (line-of-sight) axis. The shape and intensity of the rotated pressure fields are unchanged

320 compared to the reference, because the reconstruction was trained with rotated beam maps  
321 to accommodate rotations. The projected pressure amplitudes in the focus were 5934 Pa·m  
322 ( $0^\circ$ ), 6152 Pa·m ( $15^\circ$ ) and 5749 Pa·m ( $30^\circ$ ). FWHM's in the  $x$  dimension were 1.4 mm ( $0^\circ$ ),  
323 1.7 mm ( $15^\circ$ ) and 1.8 mm ( $30^\circ$ ), and 11.7 mm ( $0^\circ$ ), 10.8 mm ( $15^\circ$ ), and 11.3 mm ( $30^\circ$ ) in the  
324  $z$  dimension. Fig. 9b further shows CW-BOS RMS projected pressure maps measured with  
325 the camera translated  $\pm 2.5$  cm along the  $z$ -dimension, with a  $150 \text{ mV}_{\text{pp}}$  driving voltage.  
326 The intensity and shape of pressure fields were again unchanged compared to the reference.  
327 The projected pressure amplitudes around the focus were 4348 Pa·m (no translation), 4616  
328 Pa·m ( $-2.5$  cm) and 4344 Pa·m ( $+2.5$  cm). FWHM's in the  $x$  dimension were 1.5 mm (no  
329 translation,  $-2.5$  cm and  $+2.5$  cm), and 12.1 mm (no translation), 11.5 mm ( $-2.5$  cm), and  
330 11.4 mm ( $+2.5$  cm) in the  $z$  dimension.

### 331 **E. Aberrations.**

332 An important potential application of the CW-BOS projection beam mapping method is  
333 to detect beam aberrations on clinical FUS systems. Fig. 10a shows an acoustic aberrator<sup>56</sup>  
334 made from silicone (Elite double 8, Zhermack, Badina Polesine, Italy) constructed to block  
335 the bottom half of the 1.16 MHz transducer. CW-BOS RMS projected beam maps and  
336 hydrophone beam maps measured with this aberrator configuration are shown in Fig. 10b.  
337 The beams' intensities and shapes are closely matched, and the RMSE between them was  
338 256 Pa·m (10.8% of the hydrophone-measured peak amplitude). Fig. 10c further shows the  
339 lens placed to block the left half of the transducer, and Fig. 10d shows measured beam maps



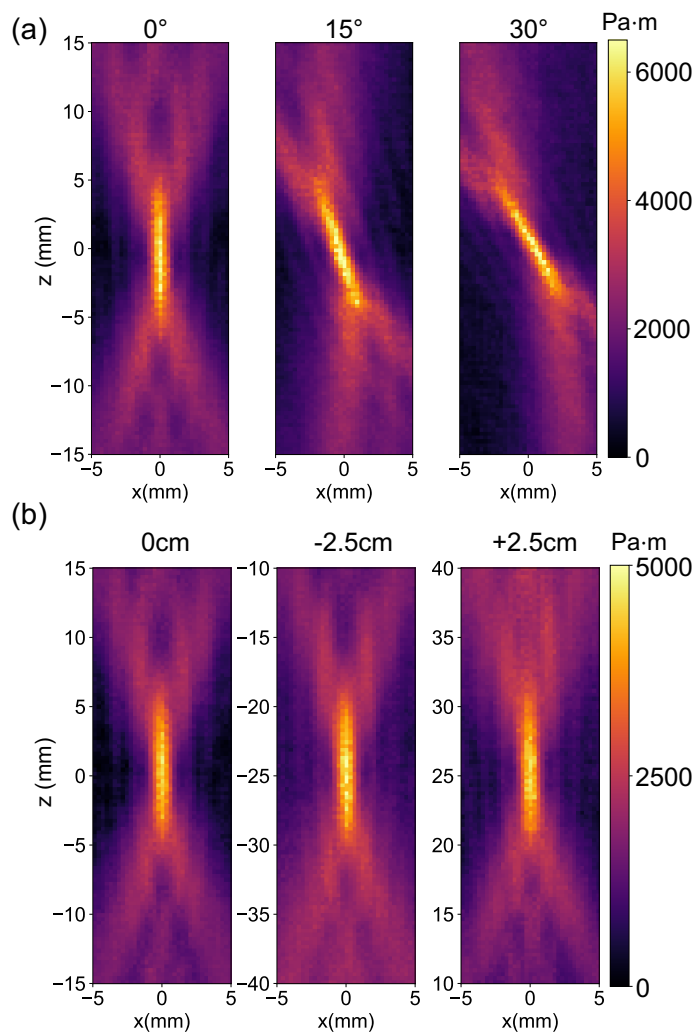

FIG. 9. Rotational and translational invariance. a) Reconstructed RMS projected pressure maps obtained by rotating the 1.16 MHz transducer  $0^\circ$ ,  $15^\circ$ , and  $30^\circ$ . b) Reconstructed RMS projected pressure map obtained with the camera focus centered on the focus, and shifted  $\pm 2.5$  cm along the z-axis.

340 with this configuration. The maps again correspond closely, with an RMSE of 442 Pa·m  
341 (22.6% of the hydrophone-measured peak amplitude).

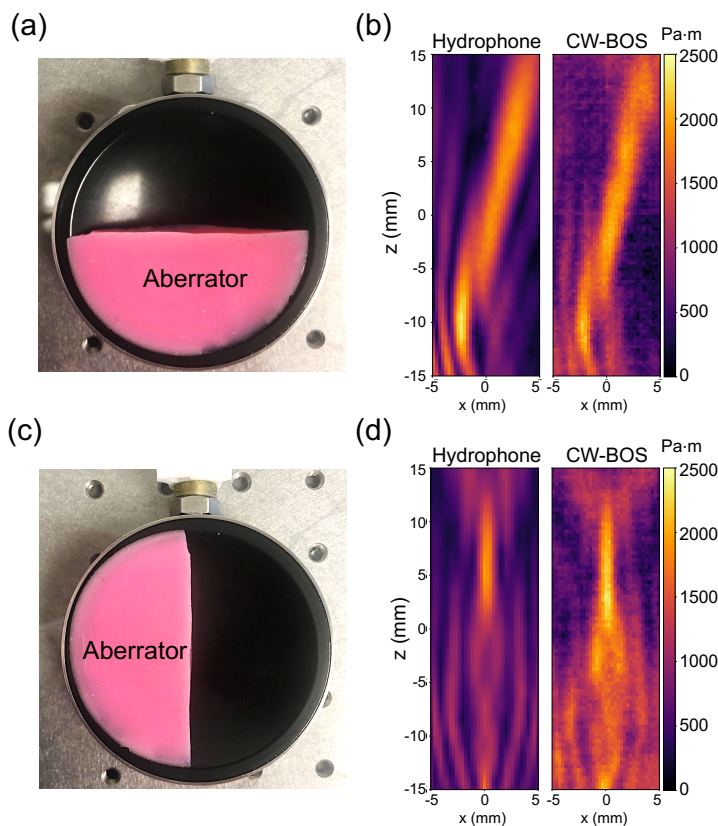

FIG. 10. Aberrated beam mapping. a) An aberrator made from silicone was placed in front of the bottom half of the 1.16 MHz transducer. b) Optical hydrophone and CW-BOS projected beam maps measured with the bottom half of the transducer blocked. c) The aberrator positioned to block the left half of the transducer. d) Optical hydrophone and CW-BOS projected beam maps measured with the left half of the transducer blocked.

#### 342 IV. CONCLUDING REMARKS

343 Quantitative and fast mapping of FUS pressure fields is essential for treatment planning,  
344 safety, dosimetry, quality assurance and technical research<sup>5</sup>. We have proposed and demon-  
345 strated a rapid and inexpensive optical method to quantitatively map FUS pressure fields in  
346 two dimensions, which requires only a water tank, a tablet to display background patterns,

347 a camera and a PC to reconstruct beam maps. The method could also be used to map  
348 the beams of focused imaging transducers, which are capable of generating similar pressure  
349 amplitudes to the FUS transducers evaluated here; the described experimental setup was  
350 sensitive to pressure beams with peak negative pressures less than 1 MPa. Unlike previous  
351 optical beam mapping methods that used strobed light sources to “freeze” the ultrasound  
352 beam at different phases so that it can be reconstructed algebraically<sup>42</sup>, we simplified the  
353 hardware setup by allowing the beam to run continuously during the acquisition which  
354 causes a blur rather than a coherent shift of the background pattern, and then used a deep  
355 neural network to solve the difficult inverse problem of reconstructing projected pressure  
356 amplitudes from the blurred image at each location in the photograph. We described a  
357 complete 2D BOS hardware system and acquisition protocol, described a forward model  
358 for image formation, and established a reconstruction. It is important to note that the  
359 reconstruction network operates only on one spatial location at a time, and does not make  
360 assumptions about spatial smoothness or structure of the beam in the imaged 2D plane, yet  
361 it produced beam maps that closely matched optical hydrophone measurements. This way,  
362 the technique maintains generality for important applications where beam structure would  
363 be difficult to predict, such as when mapping aberrated fields as was demonstrated here, or  
364 when the beam rotates or moves.

365 CW-BOS is an inexpensive (under \$2000 USD) and rapid 2D FUS beam mapping tool  
366 based on a consumer-grade tablet and camera, with no moving parts or parts that can  
367 experience wear from the FUS beam. To make it portable, the tank could be sealed, the  
368 tablet and camera could be rigidly attached to it, and FUS could be coupled into it via a

369 mylar membrane. Sealing the tank could also enable replacement of degassed water with a  
370 transparent liquid or gel that better approximates ultrasound propagation and absorption  
371 in tissue. This would represent the first truly portable beam mapping method. The re-  
372 constructor network would need to be trained for the specific frequency of the transducer,  
373 though with further work it may be possible to train a single network for a wide range of  
374 FUS frequencies. Our total CW-BOS scan times were 3-5 minutes, which was dominated  
375 by delays including photo transfers from the camera to the PC, and comprised less than 8  
376 seconds of FUS-on time. We expect that with optimization, the total scan duration could be  
377 reduced to less than 10 seconds; reconstruction in MATLAB and Python then took another  
378 20 seconds which could be further optimized, and does not require a high-end computer.  
379 Overall, the method achieves an approximate 2000x speedup compared to the time required  
380 to obtain the same information using a hydrophone. While the proposed hardware is not  
381 currently compatible with very large-aperture transcranial FUS transducers whose foci do  
382 not extend beyond their shell, it may be possible to map these systems by projecting back-  
383 ground patterns onto the transducer surface.

384 There are several possible ways to improve or extend the proposed technique. First, a  
385 larger convolutional neural network that operates on entire photos rather than individual  
386 segmented histograms may achieve improved accuracy by learning spatial relationships be-  
387 tween blurring patterns and FUS beam features, and it could enable the use of a single,  
388 dense background pattern to reduce acquisition times. However, this would require a much  
389 larger training corpus to maintain generality, as well as more computation and memory,  
390 both for training and reconstruction. We also assumed a parallel ray geometry between the

391 background pattern and the camera in this work, but it may be possible to generate more  
392 accurate training histograms using ray tracing<sup>57,58</sup>. Finally, it may be possible to extend the  
393 method to reconstruct not just projected waveform amplitudes but also projected waveforms  
394 themselves, which would be needed to reconstruct 3D beam maps. A 3D system would also  
395 require the optics and the transducer to be rotated with respect to each other.

## 396 ACKNOWLEDGMENTS

397 This work was supported by NIH grant R21 EB 024199. The authors would like to thank  
398 Charlotte Sappo for help with the shutter switch, and Marshall (Tony) Phipps with help  
399 using the optical hydrophone and FUS amplifier.

## 400 REFERENCES

- 401 <sup>1</sup>P. Ghanouni, K. Butts Pauly, W. J. Elias, J. Henderson, J. Sheehan, S. Monteith, and  
402 M. Wintermark, “Transcranial MRI-guided focused ultrasound: A review of the techno-  
403 logic and neurologic applications,” *Am J Roentgenol* **205**(1), 150–159 (2015).
- 404 <sup>2</sup>W. J. Elias, D. Huss, T. Voss, J. Loomba, M. Khaled, E. Zadicario, R. C. Frysinger, S. A.  
405 Sperling, S. Wylie, S. J. Monteith, J. Druzgal, B. B. Shah, M. Harrison, and M. Winter-  
406 mark, “A Pilot Study of Focused Ultrasound Thalamotomy for Essential Tremor,” *New*  
407 *Engl J Med* **369**(7), 640–648 (2013).
- 408 <sup>3</sup>N. Lipsman, Y. Meng, A. J. Bethune, Y. Huang, B. Lam, M. Masellis, N. Herrmann,  
409 C. Heyn, I. Aubert, A. Boutet, G. S. Smith, K. Hynynen, and S. E. Black, “Blood–brain

410 barrier opening in Alzheimer’s disease using MR-guided focused ultrasound,” *Nat Comm*  
411 **9**, 2336 (2018).

412 <sup>4</sup>G. R. Ter Haar and D. Robertson, “Tissue destruction with focused ultrasound in vivo,”  
413 *European urology* **23**, 8–11 (1993).

414 <sup>5</sup>G. Ter Haar, “Safety first: Progress in calibrating high-intensity focused ultrasound treat-  
415 ments,” *Imaging in Medicine* **5**(6), 567–575 (2013).

416 <sup>6</sup>S. H. Wong, M. Kupnik, R. D. Watkins, K. Butts-Pauly, and B. T. Khuri-Yakub, “Ca-  
417 pacitive micromachined ultrasonic transducers for therapeutic ultrasound applications,”  
418 *IEEE transactions on Biomedical Engineering* **57**(1), 114–123 (2009).

419 <sup>7</sup>G. Clement and K. Hynynen, “A non-invasive method for focusing ultrasound through the  
420 human skull,” *Physics in Medicine & Biology* **47**(8), 1219 (2002).

421 <sup>8</sup>J. Aarnio, G. T. Clement, and K. Hynynen, “A new ultrasound method for determining  
422 the acoustic phase shifts caused by the skull bone,” *Ultrasound in medicine & biology*  
423 **31**(6), 771–780 (2005).

424 <sup>9</sup>A. Kyriakou, E. Neufeld, B. Werner, M. M. Paulides, G. Szekely, and N. Kuster, “A  
425 review of numerical and experimental compensation techniques for skull-induced phase  
426 aberrations in transcranial focused ultrasound,” *International Journal of Hyperthermia*  
427 **30**(1), 36–46 (2014).

428 <sup>10</sup>R. J. Lalonde, A. Worthington, and J. W. Hunt, “Field conjugate acoustic lenses for  
429 ultrasound hyperthermia,” *IEEE transactions on ultrasonics, ferroelectrics, and frequency*  
430 *control* **40**(5), 592–602 (1993).

431 <sup>11</sup>H. W. Baac, J. G. Ok, A. Maxwell, K.-T. Lee, Y.-C. Chen, A. J. Hart, Z. Xu, E. Yoon,  
432 and L. J. Guo, “Carbon-nanotube optoacoustic lens for focused ultrasound generation and  
433 high-precision targeted therapy,” *Sci Rep* **2**, 989 (2012).

434 <sup>12</sup>C. Chang, K. Firouzi, K. K. Park, A. F. Sarioglu, A. Nikoozadeh, H.-S. Yoon,  
435 S. Vaithilingam, T. Carver, and B. T. Khuri-Yakub, “Acoustic lens for capacitive mi-  
436 cromachined ultrasonic transducers,” *Journal of Micromechanics and Microengineering*  
437 **24**(8), 085007 (2014).

438 <sup>13</sup>J. R. Corea, A. M. Flynn, B. Lechêne, G. Scott, G. D. Reed, P. J. Shin, M. Lustig, and  
439 A. C. Arias, “Screen-printed flexible mri receive coils,” *Nature communications* **7**, 10839  
440 (2016).

441 <sup>14</sup>M. S. Canney, M. R. Bailey, L. A. Crum, V. A. Khokhlova, and O. A. Sapozhnikov,  
442 “Acoustic characterization of high intensity focused ultrasound fields: A combined mea-  
443 surement and modeling approach,” *The Journal of the Acoustical Society of America*  
444 **124**(4), 2406–2420 (2008).

445 <sup>15</sup>W. Kreider, P. V. Yuldashev, O. A. Sapozhnikov, N. Farr, A. Partanen, M. R. Bailey, and  
446 V. A. Khokhlova, “Characterization of a multi-element clinical HIFU system using acoustic  
447 holography and nonlinear modeling,” *IEEE transactions on ultrasonics, ferroelectrics, and*  
448 *frequency control* **60**(8), 1683–1698 (2013).

449 <sup>16</sup>O. V. Bessonova and V. Wilkens, “Membrane hydrophone measurement and numerical  
450 simulation of HIFU fields up to developed shock regimes,” *IEEE transactions on ultrason-*  
451 *ics, ferroelectrics, and frequency control* **60**(2), 290–300 (2013).

- 452 <sup>17</sup>Y. Zhou, L. Zhai, R. Simmons, and P. Zhong, “Measurement of high intensity focused  
453 ultrasound fields by a fiber optic probe hydrophone,” *The Journal of the Acoustical Society*  
454 *of America* **120**(2), 676–685 (2006).
- 455 <sup>18</sup>N. R. Bronson, “An inexpensive schlieren apparatus,” *Ultrasonics* **7**(1), 67–70 (1969).
- 456 <sup>19</sup>D. R. Newman, “Ultrasonic schlieren system using a pulsed gas laser,” *IEEE Transactions*  
457 *on Sonics and Ultrasonics* **20**(3), 282–284 (1973).
- 458 <sup>20</sup>S. W. Smith and F. L. Thurstone, “Schlieren study of pulsed ultrasound transmission  
459 through human skull,” *Journal of Clinical Ultrasound* **2**(1), 55–59 (1974).
- 460 <sup>21</sup>V. M. Baborovsky, “Visualisation of ultrasound in solids,” *Physics in Technology* **10**(4),  
461 171 (1979).
- 462 <sup>22</sup>E. K. Reichel, S. C. Schneider, and B. G. Zagar, “Characterization of ultrasonic trans-  
463 ducers using the Schlieren–technique,” in *2005 IEEE Instrumentation and Measurement*  
464 *Technology Conference Proceedings*, IEEE (2005), Vol. 3, pp. 1956–1960.
- 465 <sup>23</sup>C. I. Zanelli and S. M. Howard, “Schlieren metrology for high frequency medical ultra-  
466 sound,” *Ultrasonics* **44**, e105–e107 (2006).
- 467 <sup>24</sup>D. A. Christensen and A. Chao, “A pulsed Schlieren system for visualizing beams from  
468 phased-array HIFU applicators,” in *AIP Conference Proceedings*, AIP (2007), Vol. 911,  
469 pp. 15–19.
- 470 <sup>25</sup>L. D. Johns, S. J. Straub, and S. M. Howard, “Analysis of effective radiating area, power,  
471 intensity, and field characteristics of ultrasound transducers,” *Archives of physical medicine*  
472 *and rehabilitation* **88**(1), 124–129 (2007).



- 473 <sup>26</sup>T. Neumann and H. Ermert, “Schlieren visualization of ultrasonic wave fields with high  
474 spatial resolution,” *Ultrasonics* **44**, e1561–e1566 (2006).
- 475 <sup>27</sup>R. Reibold and W. Molkenstruck, “Light diffraction tomography applied to the investiga-  
476 tion of ultrasonic fields. Part I: Continuous waves,” *Acta Acustica united with Acustica*  
477 **56**(3), 180–192 (1984).
- 478 <sup>28</sup>A. Hanafy and C. Zanelli, “Quantitative real-time pulsed schlieren imaging of ultrasonic  
479 waves,” in *IEEE 1991 Ultrasonics Symposium*, IEEE (1991), pp. 1223–1227.
- 480 <sup>29</sup>T. A. Pitts, J. F. Greenleaf, J.-Y. L. J.-Y. Lu, and R. R. Kinnick, “Tomographic Schlieren  
481 imaging for measurement of beam pressure and intensity,” in *1994 Proceedings of IEEE*  
482 *Ultrasonics Symposium*, IEEE (1994), Vol. 3, pp. 1665–1668.
- 483 <sup>30</sup>T. Charlebois and R. Pelton, “Quantitative 2D and 3D Schlieren imaging for acoustic  
484 power and intensity measurements,” *Medical Electronics* 789–792 (1995).
- 485 <sup>31</sup>B. Schneider and K. K. Shung, “Quantitative analysis of pulsed ultrasonic beam patterns  
486 using a Schlieren system,” *IEEE transactions on ultrasonics, ferroelectrics, and frequency*  
487 *control* **43**(6), 1181–1186 (1996).
- 488 <sup>32</sup>R. Reibold, “Light diffraction tomography applied to the investigation of ultrasonic fields.  
489 Part II: Standing waves,” *Acta Acustica united with Acustica* **63**(4), 283–289 (1987).
- 490 <sup>33</sup>G. E. A. Meier, “Computerized background-oriented schlieren,” *Experiments in Fluids*  
491 **33**(1), 181–187 (2002).
- 492 <sup>34</sup>H. Richard and M. Raffel, “Principle and applications of the background oriented Schlieren  
493 (BOS) method,” *Measurement Science and Technology* **12**(9), 1576 (2001).

- 494 <sup>35</sup>L. Venkatakrisnan and G. E. A. Meier, “Density measurements using the background  
495 oriented Schlieren technique,” *Experiments in Fluids* **37**(2), 237–247 (2004).
- 496 <sup>36</sup>E. Goldhahn and J. Seume, “The background oriented schlieren technique: Sensitivity,  
497 accuracy, resolution and application to a three-dimensional density field,” *Experiments in*  
498 *Fluids* **43**(2-3), 241–249 (2007).
- 499 <sup>37</sup>B. Atcheson, I. Ihrke, W. Heidrich, A. Tevs, D. Bradley, M. Magnor, and H.-P. Seidel,  
500 “Time-resolved 3D capture of non-stationary gas flows,” in *ACM transactions on graphics*,  
501 ACM (2008), Vol. 27, p. 132.
- 502 <sup>38</sup>B. Atcheson, W. Heidrich, and I. Ihrke, “An evaluation of optical flow algorithms for  
503 background oriented schlieren imaging,” *Experiments in fluids* **46**(3), 467–476 (2009).
- 504 <sup>39</sup>T. J. Tipnis, M. V. Finnis, K. Knowles, and D. Bray, “Density measurements for rectan-  
505 gular free jets using background-oriented schlieren,” *The Aeronautical Journal* **117**(1194),  
506 771–785 (2013).
- 507 <sup>40</sup>I. Butterworth and A. Shaw, “Realtime acousto-optical QA methods for high intensity  
508 fields,” in *Proceedings of the 39th Annual Symposium of the Ultrasonic Industry Associa-*  
509 *tion*, IEEE (2010), pp. 1–5.
- 510 <sup>41</sup>R. M. Waxler and C. E. Weir, “Effect of pressure and temperature on the refractive indices  
511 of benzene, carbon tetrachloride, and water,” *Precision Meas and Calibration* **10**(2), 52–60  
512 (1963).
- 513 <sup>42</sup>A. Pulkkinen, J. J. Leskinen, and A. Tiihonen, “Ultrasound field characterization using  
514 synthetic schlieren tomography,” *The Journal of the Acoustical Society of America* **141**(6),

515 4600–4609 (2017).

516 <sup>43</sup>E. Koponen, J. J. Leskinen, T. Tarvainen, and A. Pulkkinen, “Acoustic pressure field  
517 estimation methods for synthetic schlieren tomography,” *J Acoust Soc Am* **145**, 2470  
518 (2019).

519 <sup>44</sup>R. I.-R. BT, “Studio encoding parameters of digital television for standard 4: 3 and wide-  
520 screen 16: 9 aspect ratios,” .

521 <sup>45</sup>P. Morris, A. Hurrell, A. Shaw, E. Zhang, and P. Beard, “A fabry–pérot fiber-optic ul-  
522 trasonic hydrophone for the simultaneous measurement of temperature and acoustic pres-  
523 sure,” *The Journal of the Acoustical Society of America* **125**(6), 3611–3622 (2009).

524 <sup>46</sup>C. V. Raman and K. S. Venkataraman, “Determination of the adiabatic piezo-optic co-  
525 efficient of liquids,” *Proceedings of the Royal Society of London. Series A. Mathematical*  
526 *and Physical Sciences* **171**(945), 137–147 (1939).

527 <sup>47</sup>W. A. Riley and W. R. Klein, “Piezo-optic coefficients of liquids,” *The Journal of the*  
528 *Acoustical Society of America* **42**(6), 1258–1261 (1967).

529 <sup>48</sup>B. B. Tripathi, D. Espíndola, and G. F. Pinton, “Piecewise parabolic method for propa-  
530 gation of shear shock waves in relaxing soft solids: One-dimensional case,” *International*  
531 *journal for numerical methods in biomedical engineering* **35**(5), e3187 (2019).

532 <sup>49</sup>F. Dagrau, M. Rénier, R. Marchiano, and F. Coulouvrat, “Acoustic shock wave propaga-  
533 tion in a heterogeneous medium: A numerical simulation beyond the parabolic approxi-  
534 mation,” *The Journal of the Acoustical Society of America* **130**(1), 20–32 (2011).

- 535 <sup>50</sup>V. Rusanov, “On difference schemes of third order accuracy for nonlinear hyperbolic sys-  
536 tems,” *Journal of Computational Physics* **5**(3), 507–516 (1970).
- 537 <sup>51</sup>D. F. McGivney, E. Pierre, D. Ma, Y. Jiang, H. Saybasili, V. Gulani, and M. A. Gris-  
538 wold, “Svd compression for magnetic resonance fingerprinting in the time domain,” *IEEE*  
539 *transactions on medical imaging* **33**(12), 2311–2322 (2014).
- 540 <sup>52</sup>M. Turk and A. Pentland, “Eigenfaces for recognition,” *Journal of cognitive neuroscience*  
541 **3**(1), 71–86 (1991).
- 542 <sup>53</sup>F. Chollet *et al.*, “Keras” (2015).
- 543 <sup>54</sup>M. Abadi, P. Barham, J. Chen, Z. Chen, A. Davis, J. Dean, M. Devin, S. Ghemawat,  
544 G. Irving, M. Isard, *et al.*, “Tensorflow: A system for large-scale machine learning,” in  
545 *12th {USENIX} Symposium on Operating Systems Design and Implementation ({OSDI}*  
546 *16)* (2016), pp. 265–283.
- 547 <sup>55</sup>T. Tieleman and G. Hinton, “Lecture 6.5-rmsprop: Divide the gradient by a running  
548 average of its recent magnitude,” *COURSERA: Neural networks for machine learning*  
549 **4**(2), 26–31 (2012).
- 550 <sup>56</sup>G. Maimbourg, A. Houdouin, T. Deffieux, M. Tanter, and J.-F. Aubry, “3d-printed adap-  
551 tive acoustic lens as a disruptive technology for transcranial ultrasound therapy using  
552 single-element transducers,” *Physics in Medicine & Biology* **63**(2), 025026 (2018).
- 553 <sup>57</sup>A. S. Glassner, *An introduction to ray tracing* (Elsevier, 1989).
- 554 <sup>58</sup>B. A. Barsky, D. R. Horn, S. A. Klein, J. A. Pang, and M. Yu, “Camera models and optical  
555 systems used in computer graphics: Part I, object-based techniques,” in *International*

556 *conference on computational science and its applications*, Springer (2003), pp. 246–255.
